# Supplementary material for: Water-soluble pyridine-based colorimetric chemosensor for naked eye detection of silver ions: design, synthesis, spectral and theoretical investigation
Source: Royal Society of Chemistry journal article supplement (doi:10.1039/c4ay01592d), 2014-01-01
Supplement: c4ay01592d1.pdf [file c4ay01592d1.pdf]

## Supporting information

### **Water-soluble pyridine based colorimetric chemosensor for naked eye detection of silver ion: Design, synthesis, spectral and theoretical investigation**

**B. Annaraj and M.A. Neelakantan\***

*Chemistry Research Centre, National Engineering College, K.R.Nagar, Kovilpatti - 628 503,  
Thoothukudi District, Tamil Nadu, India*

*Email: [maneels@rediffmail.com](mailto:maneels@rediffmail.com); [drmaneelakantan@gmail.com](mailto:drmaneelakantan@gmail.com)*

## Theoretical calculation:

To examine the mode of interaction and to understand the sensing behavior of **L** with  $\text{Ag}^+$ , we carried out density functional theory (DFT) calculations with Becke's three parametrized Lee-Yang-Parr (B3LYP) [1] exchange functional with 6-31G\* basis sets, using a suite of Gaussian 09 programs [2]. Molecular geometry of the sensor (**L**) was optimized by 6-31G\* level. The optimized structure of **L** was very close to the single crystal X-ray diffraction structure. The structure of **L** –  $\text{Ag}^+$  was calculated by B3LYP/6-31g(d,p) + Lanl2DZ effective core potential (ECP). The electronic absorption spectra of **L** and **L**+ $\text{Ag}^+$  have been calculated using TD-DFT calculation.

The optimized geometries of **L** and its 1:1 complex with  $\text{Ag}^+$  ion are shown in the figure, which displays the effective binding sites, namely azoethine-N, Phenolic-OH and aliphatic-OH for  $\text{Ag}^+$  ion (Fig. S12). The pyridine moiety of **L** has a HOMO character predominantly, whereas LUMO orbital covers whole the molecule (Fig. S13). In the presence of  $\text{Ag}^+$ , the HOMO and LUMO orbitals are located on **L** and  $\text{Ag}^+$  by well separated manner. This type of HOMO-LUMO distribution is clearly indicating the significant electron transfer from one part of **L** to another i.e metal centre to ligand. The energy difference between HOMO-LUMO of **L** is 4.39 eV and the binding of  $\text{Ag}^+$  ions with **L** reduces the energy gap to 1.71 eV. It implies that addition of the metal ions leads to the stabilization of the HOMO and LUMO of the fluorophores. The DFT calculations were carried out to study the interaction between **L** and  $\text{Pb}^+$  ions. The frontier molecular orbital of **L**+ $\text{Pb}$  (Fig. S14) is completely different from that of **L**+ $\text{Ag}^+$  clearly demonstrates the non interaction between **L** and  $\text{Pb}^+$ . The computed UV-Visible spectra of **L** and **L**+ $\text{Ag}$  (Fig. S15) are comparable with that of the experimental result.

1. P.J. Stephens, F.J. Devlin, C.F. Chabalowski, M.J. Frisch, *J. Phys. Chem.* 1994, **98** 11623–11627.
2. M.J. Frisch, G.W. Trucks, H.B. Schlegel, G.E. Scuseria, M.A. Robb, J.R. Cheeseman, J.A. Montgomery, T.J. Vreven, K.N. Kudin, J.C. Burant, J.M. Millam, S.S. Iyengar, J. Tomasi, V. Barone, B. Mennucci, M. Cossi, G. Scalmani, N. Rega, G.A. Petersson, H. Nakatsuji, M. Hada, M. Ehara, K. Toyota, R. Fukuda, J. Hasegawa, M. Ishida, T. Nakajima, Y. Honda, O. Kitao, H. Nakai, M. Klene, X. Li, J.E. Knox, H.P. Hratchian, J.B. Cross, C.

Adamo, J. Jaramillo, R. Gomperts, R.E. Stratmann, O. Yazyev, A.J.Austin, R. Cammi, C. Pomelli, J.W. Ochterski, P.Y. Ayala, K. Morokuma, G.A.Voth, P. Salvador, J.J. Dannenberg, V.G. Zakrzewski, S. Dapprich, A.D. Daniels, M.C. Strain, O. Farkas, D.K. Malick, A.D. Rabuck, K. Raghavachari, J.B.Foresman, J.V. Ortiz, Q. Cui, A.G. Baboul, S. Clifford, J. Cioslowski, B.B. Stefanov, G. Liu, A.Liashenko, P. Piskorz, I. Komaromi, R.L. Martin, D.J. Fox, T. Keith, M.A.Al-Laham, C.Y. Peng, A. Nanayakkara, M. Challacombe, P.M.W. Gill, B. Johnson, W. Chen, M.W. Wong, C. Gonzalez, J.A. Pople, Gaussian 03, Revision E. 01, Gaussian, Inc., Wallingford, CT, 2004.

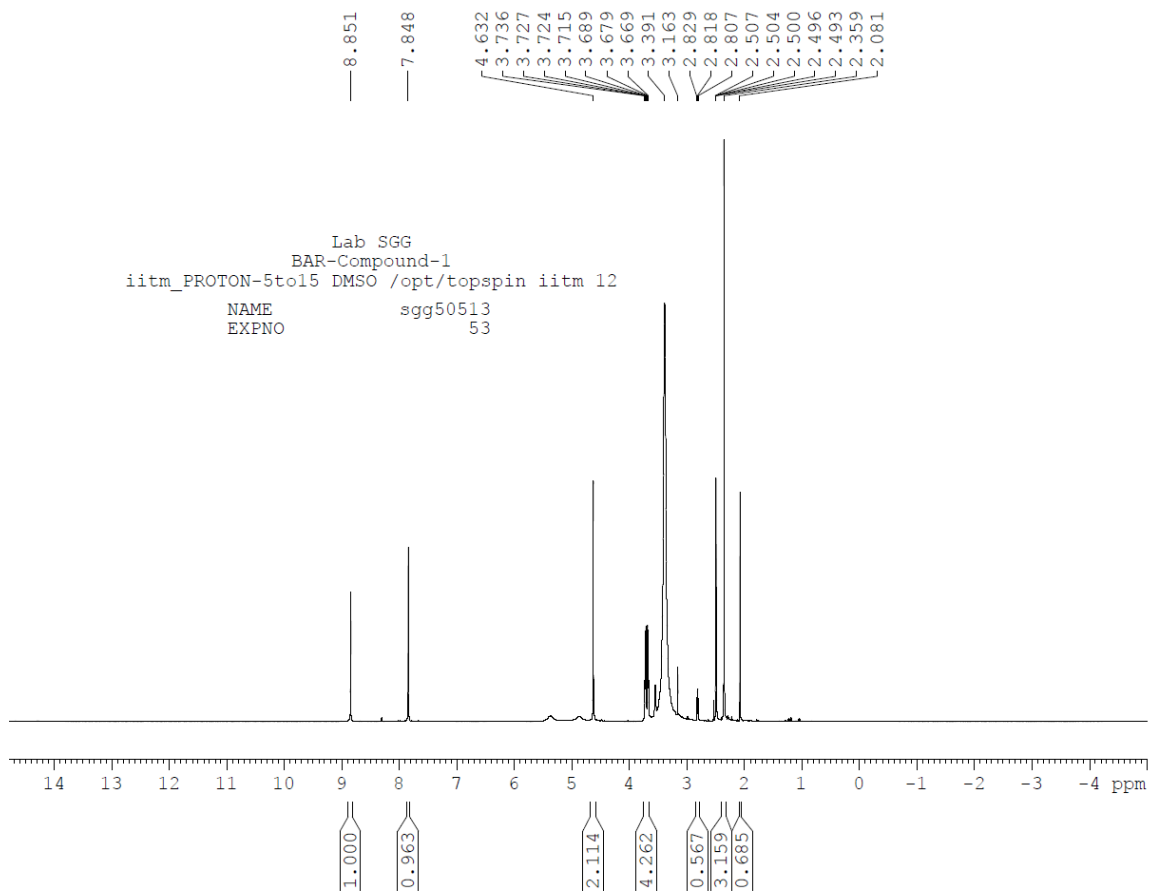

**Fig. S1**  $^1\text{H}$  NMR Spectrum of L

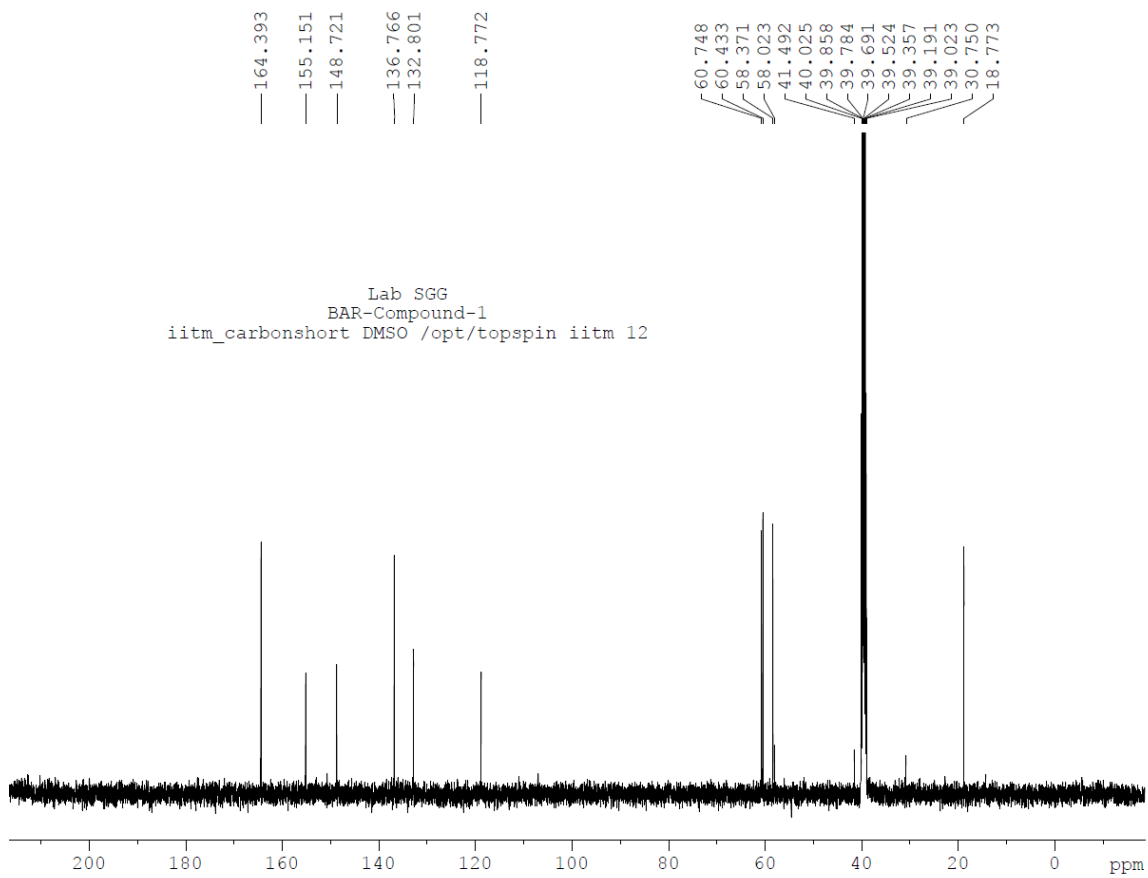

**Fig. S2**  $^{13}\text{C}$  NMR Spectrum of **L**

Sample Name 39(2174-180(L)) +-  
Method 99564.m

Analysed by Saurabh  
Date 12-09-2013

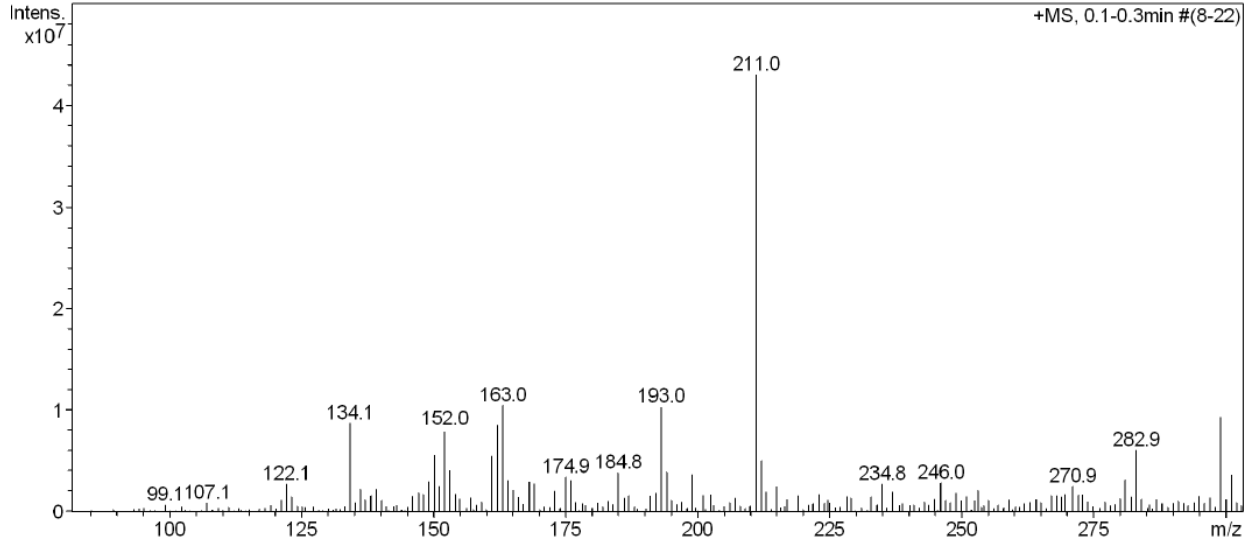

Fig. S3 ESI Mass of L

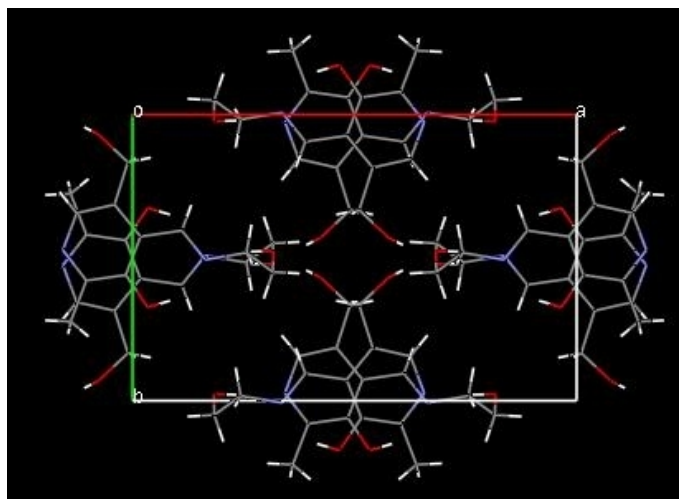

**Fig. S4** Crystal packing diagram of L viewed along C axis

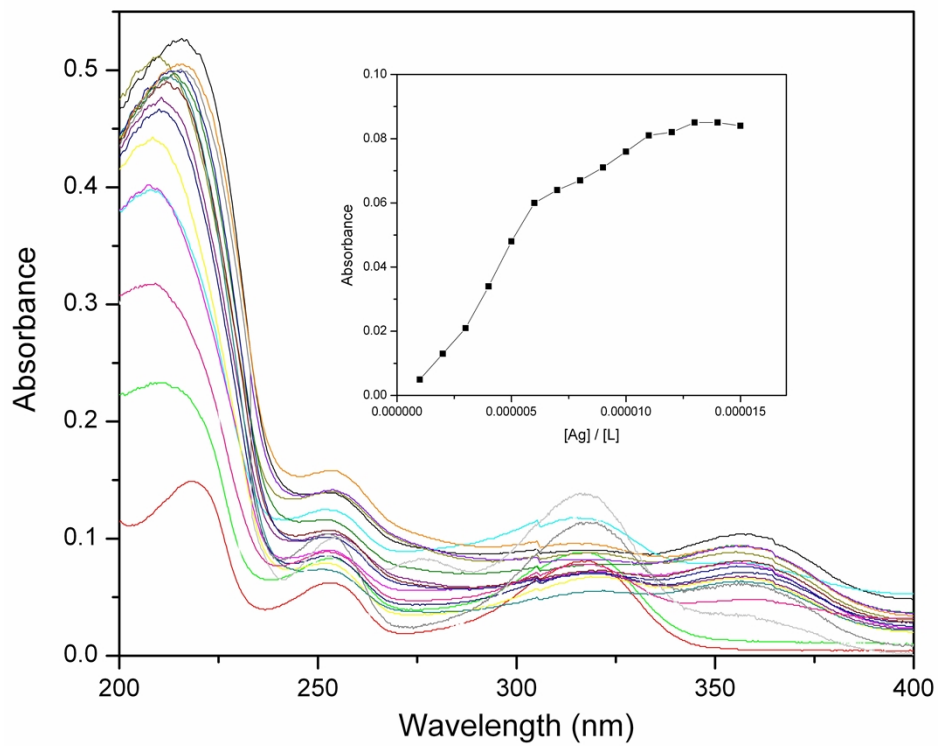

**Fig. S5** Electronic absorption spectra of **L** (20 μM) in presence of different equivalents (0.5-15) of Ag ions



Sample Name 41(2174-180 (CtAg)) +-  
Method 99566.m

Analysed by Saurabh  
Date 12-09-2013

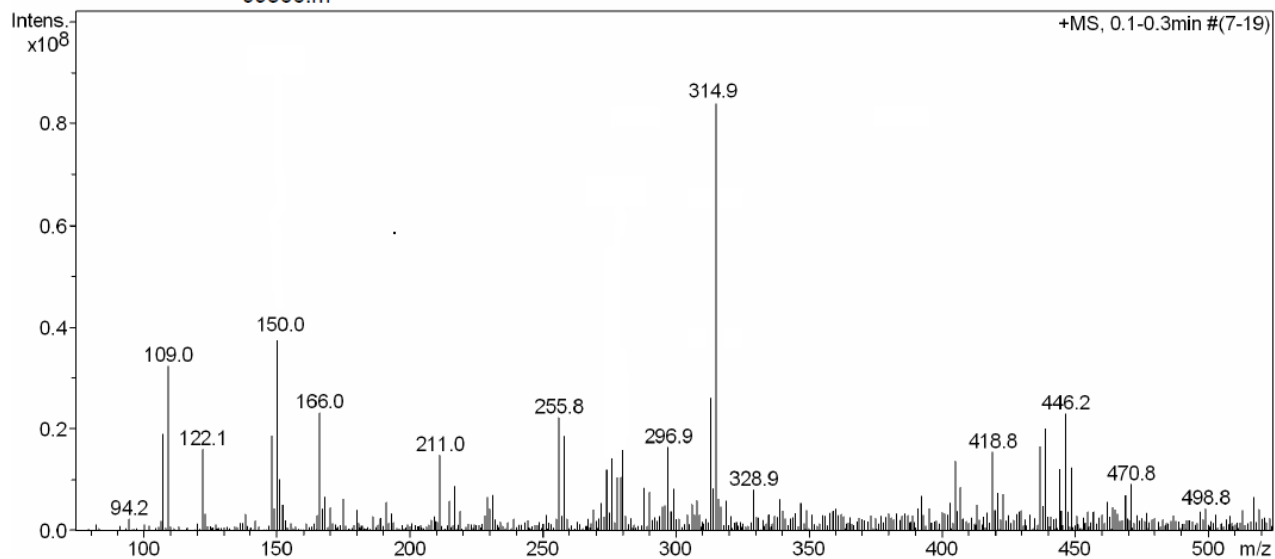

Fig. S6 ESI Mass spectrum of L+Ag

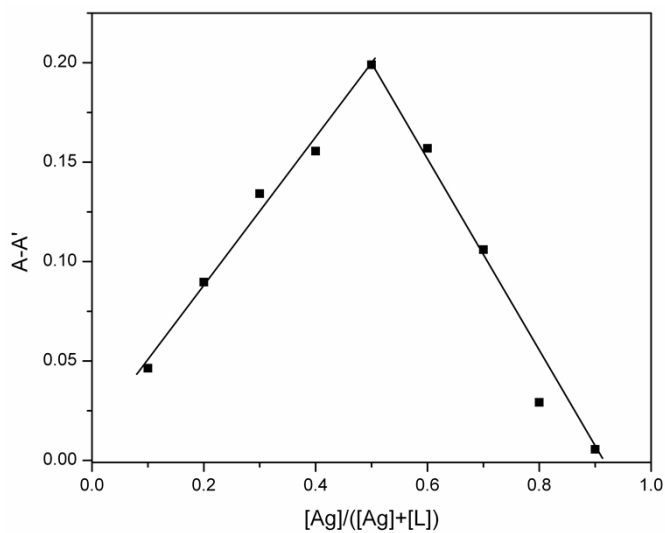

Fig. S7 JOB Plot for L and Ag showing the 1:1 complex formation

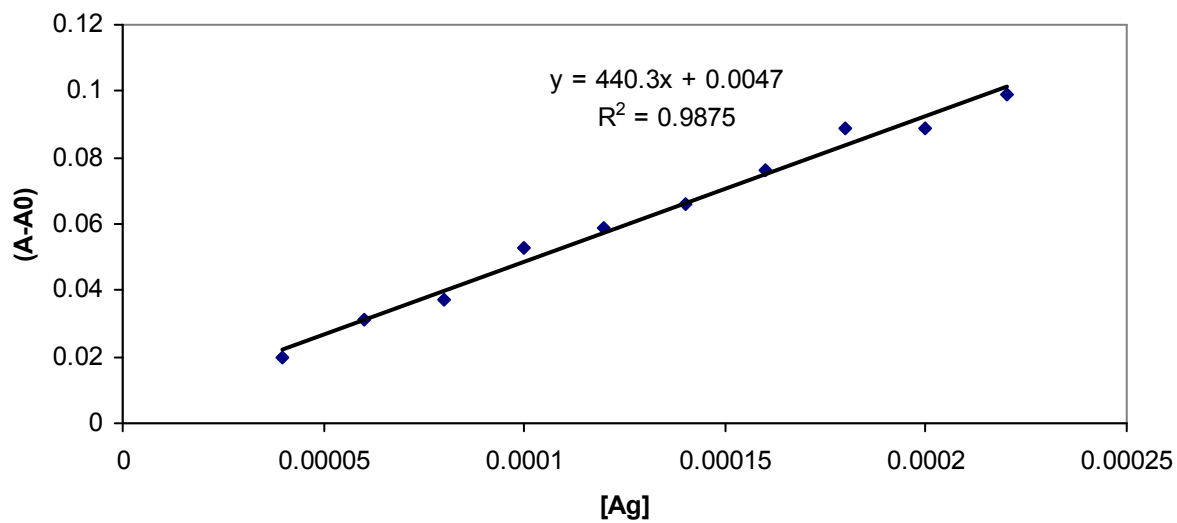

**Fig. S8** Plot for the Calculation of detection limit of **L** (20  $\mu$ M) towards Ag ion

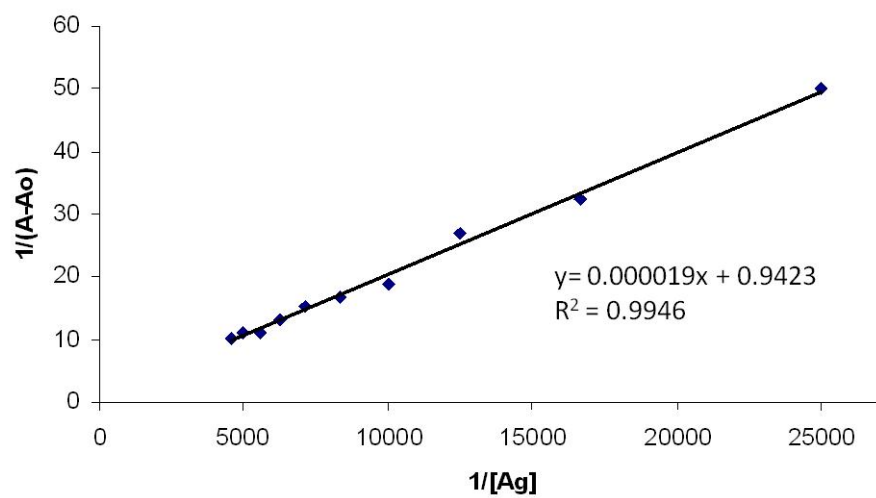

**Fig. S9** Benesi-Hilderbrand Plot for the binding of Ag ion with **L**

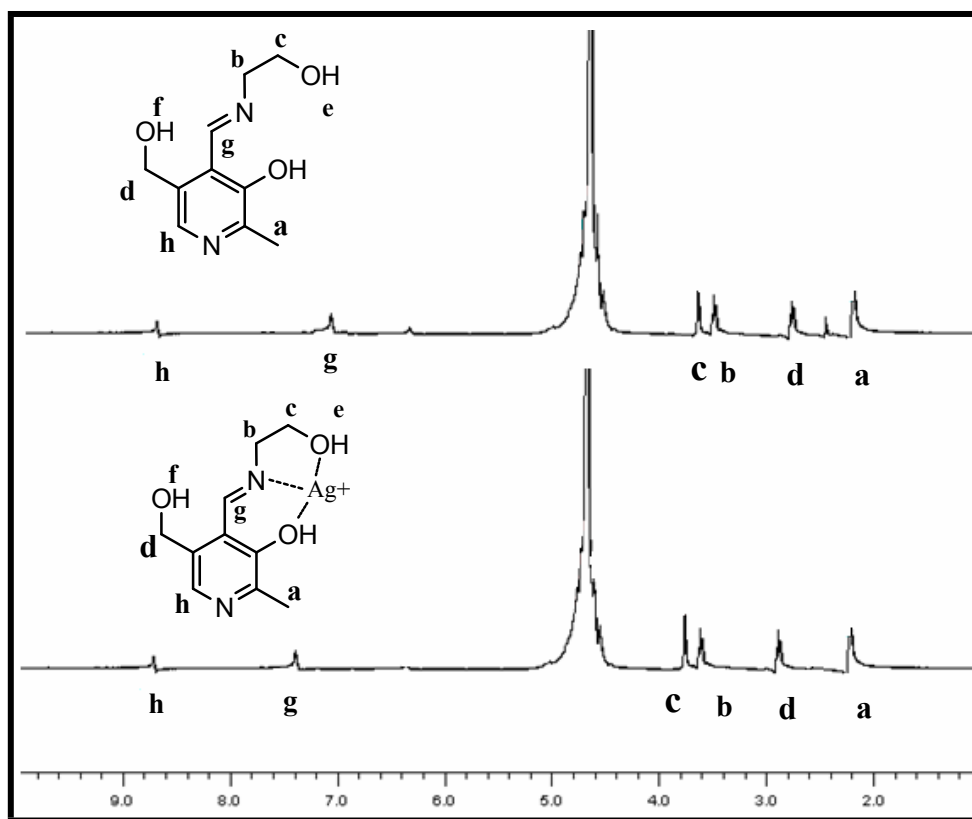

**Fig. S10**  $^1\text{H-NMR}$  Spectra of **L** and **L+Ag** recorded in  $\text{D}_2\text{O}$

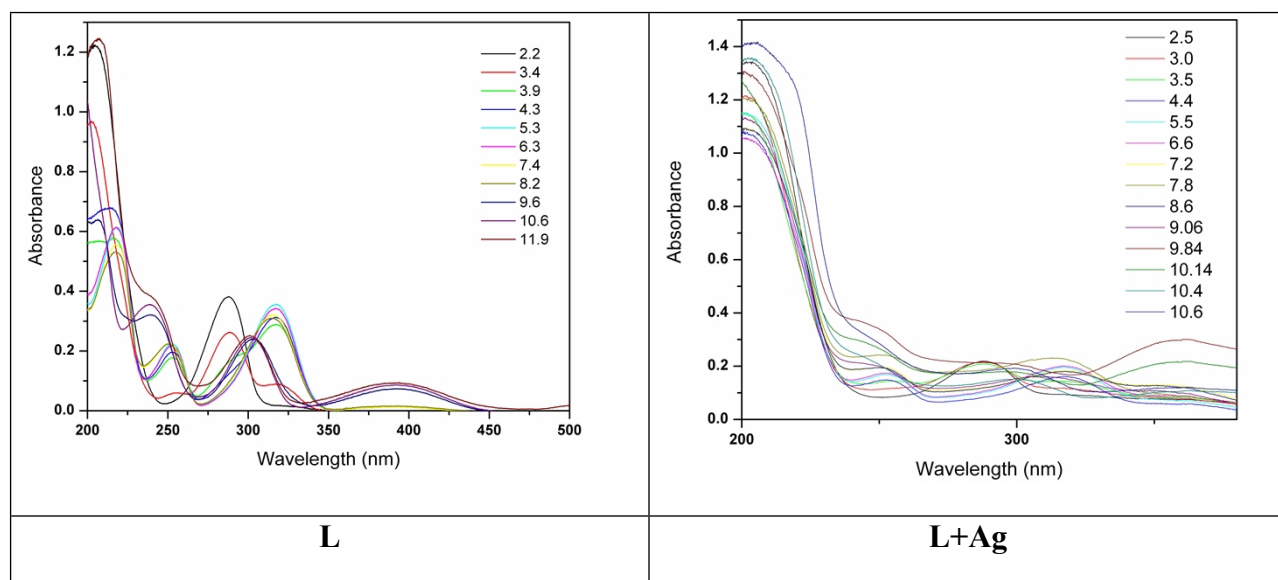

**Fig. S11** Effect of pH on the UV-Visible absorption of **L** and **L+Ag**

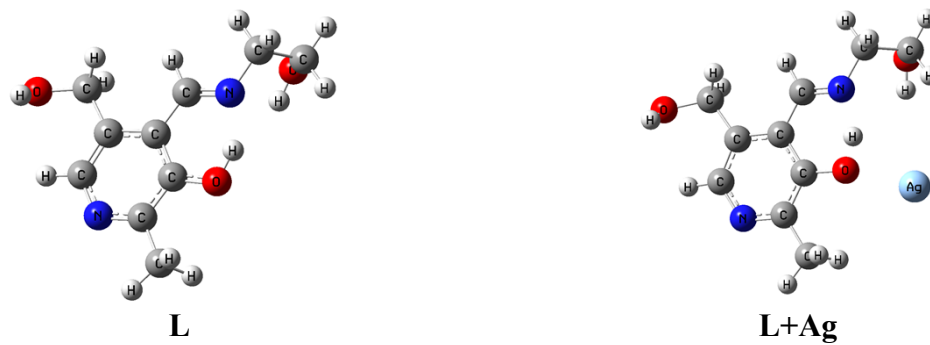

**Fig. S12** Optimized geometry of **L** and **L+Ag**

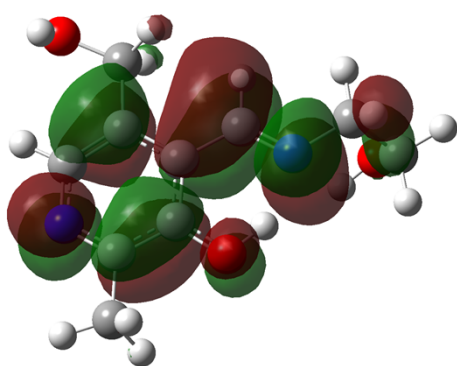

LUMO

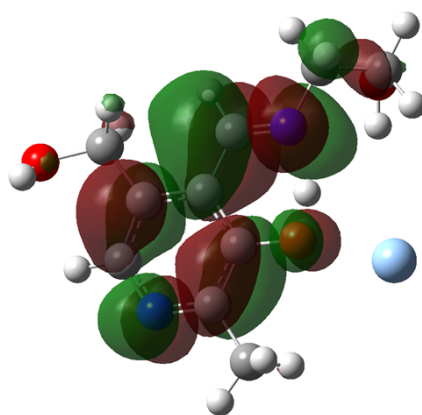

LUMO

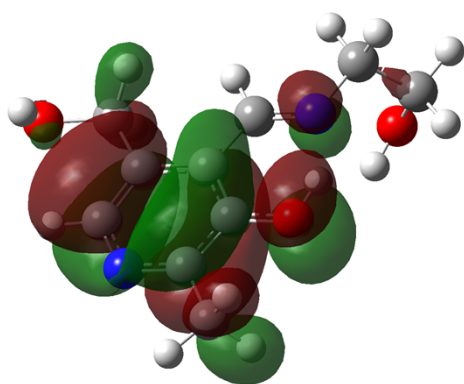

HOMO

L

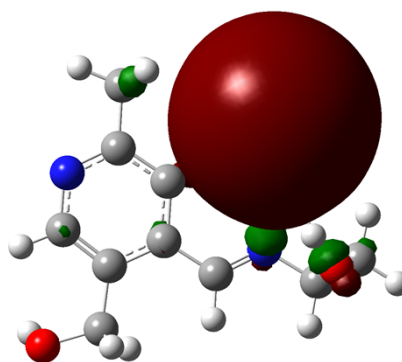

HOMO

L+Ag

**Fig. S13** Frontier molecular orbitals of **L** and **L+Ag**

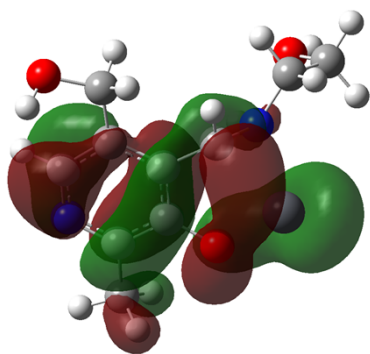

**HOMO (Pb)**

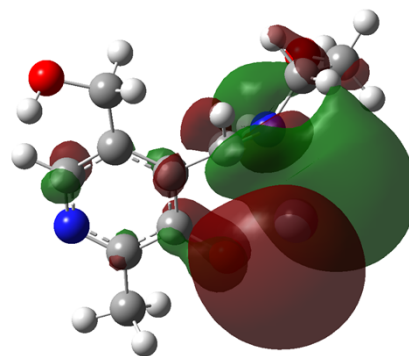

**LUMO (Pb)**

**Fig. S14** Frontier molecular orbitals of **L** and **L+Pb**

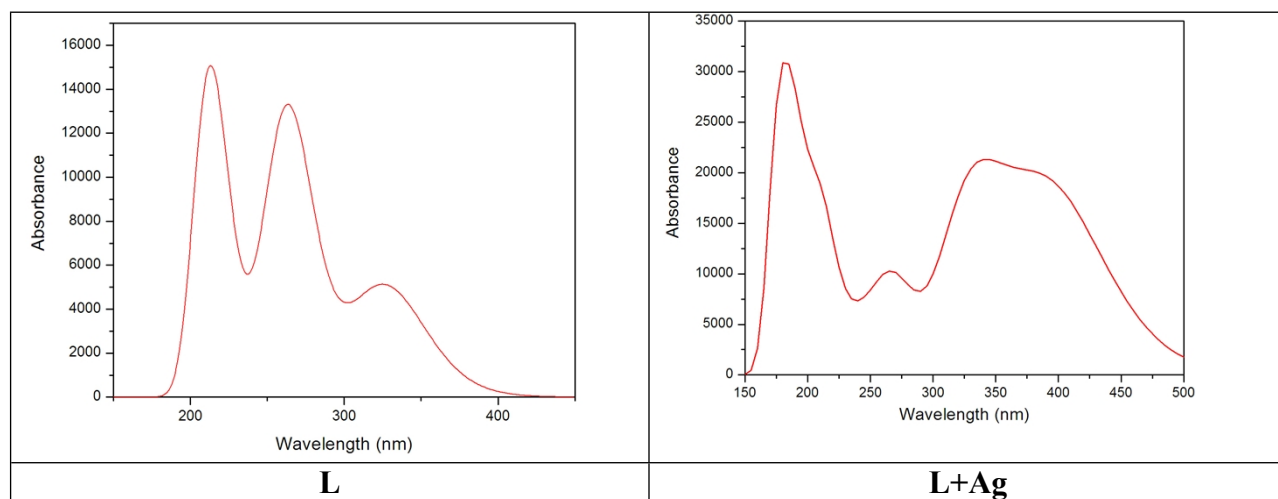

**Fig. S15** Computed UV-Visible spectra of **L** and **L+Ag**



**Table S1** Crystal Data of **L**

|                                   |                                             |
|-----------------------------------|---------------------------------------------|
| Parameters                        | <b>L</b>                                    |
| Empirical formula                 | C10 H14 N2 O3                               |
| Formula weight                    | 210.23                                      |
| Temperature                       | 296(2) K                                    |
| Wavelength                        | 0.71073 Å                                   |
| Crystal system, space group       | Monoclinic, C2/c                            |
| Unit cell dimensions              | a = 16.3383(13) Å alpha = 90 deg.           |
|                                   | b = 9.6603(13) Å beta = 113.262(7) deg.     |
|                                   | c = 13.6431(12) Å gamma = 90 deg.           |
| Volume                            | 1978.3(4) Å <sup>3</sup>                    |
| Z, Calculated density             | 8, 1.412 Mg/m <sup>3</sup>                  |
| Absorption coefficient            | 0.105 mm <sup>-1</sup>                      |
| F(000)                            | 896                                         |
| Crystal size                      | 0.40 x 0.35 x 0.30 mm                       |
| Theta range for data collection   | 2.51 to 28.29 deg.                          |
| Limiting indices                  | -21 ≤ h ≤ 21, -12 ≤ k ≤ 12, -18 ≤ l ≤ 14    |
| Reflections collected / unique    | 7654 / 2411 [R(int) = 0.0257]               |
| Completeness to theta = 28.29     | 97.90%                                      |
| Absorption correction             | Semi-empirical from equivalents             |
| Max. and min. transmission        | 0.9691 and 0.9591                           |
| Refinement method                 | Full-matrix least-squares on F <sup>2</sup> |
| Data / restraints / parameters    | 2411 / 0 / 146                              |
| Goodness-of-fit on F <sup>2</sup> | 0.879                                       |
| Final R indices [I > 2σ(I)]       | R1 = 0.0432, wR2 = 0.1242                   |
| R indices (all data)              | R1 = 0.0605, wR2 = 0.1483                   |
| Largest diff. peak and hole       | 0.234 and -0.276 e.Å <sup>-3</sup>          |



**Table S2** Selected bond length and bond angles of **L**

| Bong Length (Å)   |            |
|-------------------|------------|
| O(1)-C(5)         | 1.3368(18) |
| O(1)-H(1O1)       | 0.82       |
| N(1)-C(8)         | 1.2679(19) |
| N(1)-C(9)         | 1.4534(19) |
| O(3)-C(10)        | 1.414(2)   |
| O(3)-H(3O3)       | 0.89(3)    |
| O(2)-C(1)         | 1.404(2)   |
| O(2)-H(2O2)       | 0.92(3)    |
| C(1)-C(2)         | 1.511(2)   |
| C(1)-H(1A)        | 0.97       |
| C(1)-H(1B)        | 0.97       |
| C(2)-C(3)         | 1.371(2)   |
| C(2)-C(6)         | 1.407(2)   |
| C(6)-C(5)         | 1.399(2)   |
| C(6)-C(8)         | 1.459(2)   |
| C(8)-H(9)         | 0.93       |
| C(9)-C(10)        | 1.515(2)   |
| C(5)-C(4)         | 1.407(2)   |
| C(4)-N(2)         | 1.321(2)   |
| C(4)-C(7)         | 1.492(2)   |
| N(2)-C(3)         | 1.346(2)   |
| C(3)-H(4)         | 0.93       |
| Bond Angle (°)    |            |
| C(5)-O(1)-H(1O1)  | 109.5      |
| C(8)-N(1)-C(9)    | 119.85(14) |
| C(10)-O(3)-H(3O3) | 114.2(15)  |
| C(1)-O(2)-H(2O2)  | 111.1(15)  |
| O(2)-C(1)-C(2)    | 113.04(14) |
| C(3)-C(2)-C(6)    | 117.73(14) |
| C(3)-C(2)-C(1)    | 120.89(14) |
| C(6)-C(2)-C(1)    | 121.36(13) |
| C(5)-C(6)-C(2)    | 118.07(13) |
| C(5)-C(6)-C(8)    | 119.93(13) |
| C(2)-C(6)-C(8)    | 121.98(13) |
| N(1)-C(8)-C(6)    | 121.03(14) |
| N(1)-C(8)-H(9)    | 119.5      |
| C(6)-C(8)-H(9)    | 119.5      |
| N(1)-C(9)-C(10)   | 110.29(13) |
| O(1)-C(5)-C(6)    | 122.74(13) |

|                |            |
|----------------|------------|
| O(1)-C(5)-C(4) | 117.48(13) |
| C(6)-C(5)-C(4) | 119.78(13) |
| N(2)-C(4)-C(5) | 121.05(14) |
| N(2)-C(4)-C(7) | 119.11(14) |
| C(5)-C(4)-C(7) | 119.84(14) |
| C(4)-N(2)-C(3) | 119.19(13) |
| N(2)-C(3)-C(2) | 124.13(14) |
| N(2)-C(3)-H(4) | 117.9      |
| C(2)-C(3)-H(4) | 117.9      |

**Table S3** Analytical results for the detection of silver ions in real samples

| Sample          | Determined [Ag <sup>+</sup> ]( $\mu$ M) <sup>a</sup> | Added [Ag <sup>+</sup> ]( $\mu$ M) | By Test kit [Ag <sup>+</sup> ]( $\mu$ M) | By Absorption spectra [Ag <sup>+</sup> ]( $\mu$ M) |
|-----------------|------------------------------------------------------|------------------------------------|------------------------------------------|----------------------------------------------------|
| Drinking water  | 0.02                                                 | 40                                 | 38-40                                    | 39.08 $\pm$ 0.3                                    |
| Bore well water | 0.08                                                 | 40                                 | 38-41                                    | 40.20 $\pm$ 0.8                                    |
| Tap water       | 0.05                                                 | 40                                 | 39-41                                    | 39.80 $\pm$ 0.5                                    |

<sup>a</sup> Analysis by AAS
